# Supplementary figures and images for: Incidence of headache after COVID-19 vaccination in patients with history of headache: A cross-sectional study
Source: PubMed Central journal article supplement — Cephalalgia. 2021 Aug 18;42(3):266–72. doi: 10.1177/03331024211038654 (PMC8988452; doi:10.1177/03331024211038654), 2021-08-18

1st

2nd

0 24 48 72 96 120 144 168 192 216 240

hours

Migraine

Non-migraine

Healthy

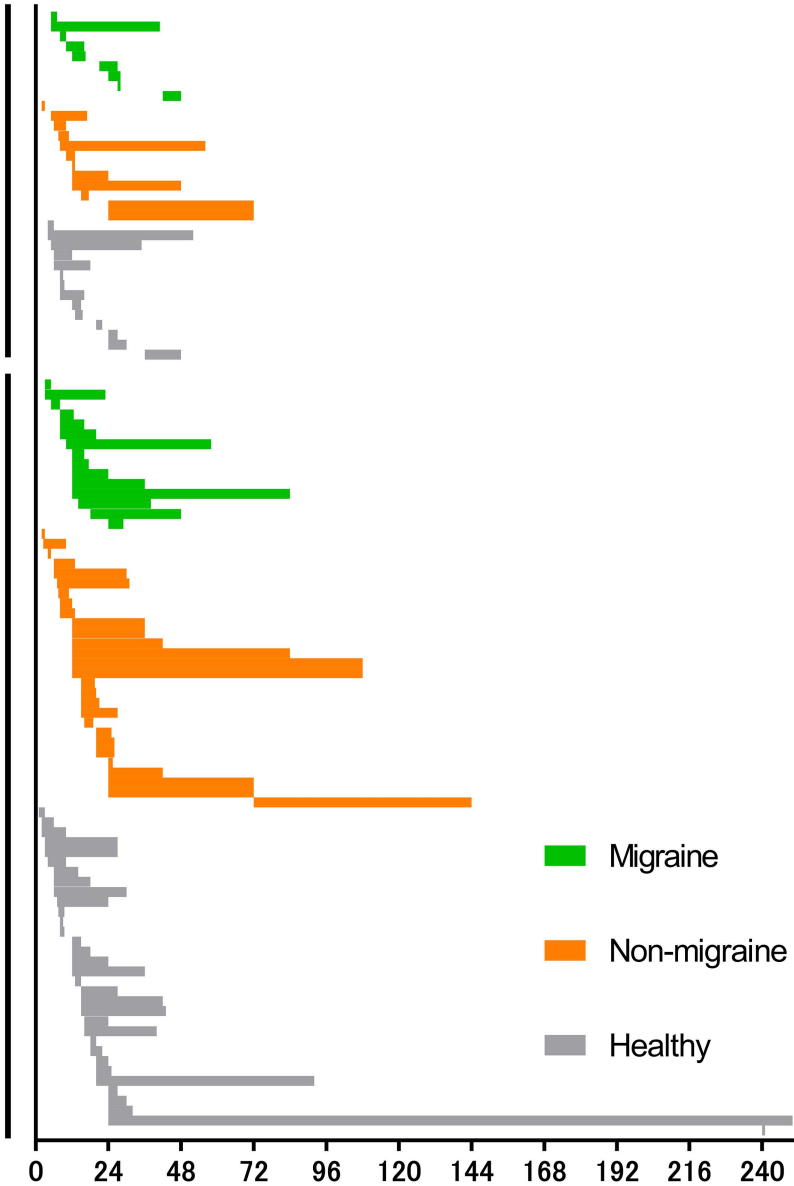

Supplement: sj-pdf-1-cep-10.1177_03331024211038654.pdf [file sj-pdf-1-cep-10.1177_03331024211038654.pdf]
